# Supplementary material for: PERMA-Profiler as a multidimensional measure of well-being in a French context
Source: Research Square preprint supplement (doi:10.21203/rs.3.rs-5821646/v1), 2025-10-01
Supplement: Supplementary file 1 [file a17e7723c9836f83853c923e.docx]

**Appendix A.** The final French version of the PERMA Profiler

List of PERMA-Profiler items in the original and the French version

| **Item No.** | **Label** | **Original version** | **French version** | **Response Anchors** |
| --- | --- | --- | --- | --- |
| 1 | A1* | How much of the time do you feel you are making progress toward accomplishing your goals? | Dans quelle mesure avez-vous l’impression que vous progressez vers l’accomplissement de vos objectifs ? | 0 = never (jamais), 10 = always (toujours) |
| 2 | P1 | In general, how often do you feel joyful? | En général, à quelle fréquence vous sentez-vous joyeux ? |
| 3 | N1 | In general, how often do you feel anxious? | En général, à quelle fréquence vous sentez-vous anxieux ? |
| 4 | A2 | How often do you achieve the important goals you have set for yourself? | A quelle fréquence atteignez-vous les objectifs importants que vous vous êtes fixés ? |
| 5 | H1 | In general, how would you say your health is? | En général, comment évalueriez-vous votre santé ? | 0 = terrible, 10 = excellent (excellente) |
| 6 | M1 | In general, to what extent do you lead a purposeful and meaningful life? | En général, dans quelle mesure menez-vous une vie utile et pleine de sens ? | 0 = not at all (pas du tout), 10 = completely (complètement) |
| 7 | R1 | To what extent do you receive help and support from others when you need it? | Dans quelle mesure recevez-vous de l’aide et du soutien de la part des autres lorsque vous en avez besoin ? |
| 8 | M2* | In general, to what extent do you feel that what you do in your life is valuable and worthwhile? | En général, dans quelle mesure pensez-vous que ce que vous faites dans votre vie a de la valeur et est digne d’intérêt ? |
| 9 | E2 | In general, to what extent do you feel excited and interested in things? | En général, dans quelle mesure vous sentez-vous excite et intéressé par les choses ? |
| 10 | Lon | How lonely do you feel in your daily life? | A quel point vous sentez-vous seul dans votre vie quotidienne ? |
| 11 | H2 | How satisfied are you with your current physical health? | Êtes-vous satisfait de votre santé physique actuelle ? |
| 12 | P2* | In general, how often do you feel positive? | En général, à quelle fréquence vous sentez-vous positif ? | 0 = never (jamais), 10 = always (toujours) |
| 13 | N2 | In general, how often do you feel angry? | En général, à quelle fréquence vous sentez-vous en colère ? |
| 14 | A3 | How often are you able to handle your responsibilities? | A quelle fréquence êtes-vous capable d’assumer vos responsabilités ? |
| 15 | N3 | In general, how often do you feel sad? | En général, à quelle fréquence vous sentez-vous triste ? |
| 16 | E3 | How often do you lose track of time while doing something you enjoy? | A quelle fréquence perdez-vous la notion du temps en faisant quelque chose que vous aimez ? |
| 17 | H3 | Compared to others of your same age and sex, how is your health? | En comparaison avec d’autres personnes du même âge et du même sexe, comment est votre santé ? | 0 = terrible, 10 = excellent (excellente) |
| 18 | R2 | To what extent do you feel loved? | Dans quelle mesure vous sentez-vous aimé ? | 0 = not at all (pas du tout), 10 = completely (complètement) |
| 19 | M3 | To what extent do you generally feel you have a sense of direction in your life? | Dans quelle mesure avez-vous généralement l’impression d’avoir un sens dans votre vie ? |
| 20 | R3 | How satisfied are you with your personal relationships? | Êtes-vous satisfait de vos relations personnelles ? |
| 21 | P3 | In general, to what extent do you feel contented? | En général, dans quelle mesure vous sentez-vous satisfait ? |
| 22 | hap | Taking all things together, how happy would you say you are? | En prenant tout en considération, diriez-vous que vous êtes heureux ? |

*Note. P: Positive emotions subscale; E: Engagement subscale; R: Relationships subscale; M: Meaning subscale; A: Accomplishment subscale; N: Negative emotions subscale; H: Health subscale; Lon: Loneliness single item; Hap: Happiness simple item. Items P3, M1 and E1 were excluded from this final version based on the statistical results of the EFA (low factor loadings or multiple saturations). Items marked an asterisk were identified as posing difficulties in terms of wording during the translation process. Two alternative versions were submitted for back-translation, then reviewed by the committee of experts to ensure conceptual fidelity to the original version.*

**Appendix B.**

***Table B1.*** Demographic and clinical data of participants by sample (1st administration)

|  | Total Sample  M ± SD or N (%) | Sample 1  M ± SD or N (%) | Sample 2  M ± SD or N (%) |
| --- | --- | --- | --- |
| Total N | 478 | 239 | 239 |
| Experimental modality |  |  |  |
| Paper | 94 (20.0%) | 52 (22.5%) | 42 (17.6%) |
| Online | 375 (80.0%) | 179 (77.5%) | 196 (82.4%) |
| Demographics data |  |  |  |
| Gender |  |  |  |
| *Male* | 114 (23.8%) | 55 (23.0%) | 59 (24.7%) |
| *Female* | 354 (74.1%) | 178 (74.5%) | 176 (73.6%) |
| *Other* | 4 (0.8%) | 1 (0.4%) | 3 (1.3%) |
| *Missing* | 6 (1.3%) | 5 (2.1%) | 1 (0.4%) |
| Age groups | 36.3 ± 14.3 | 36.5 ± 14.6 | 36.2 ± 14.1 |
| *18-24* | 113 (23.6%) | 62 (25.9%) | 51 (21.3%) |
| *25-34* | 138 (28.9%) | 57 (23.8%) | 81 (33.9%) |
| *35-44* | 91 (19.0%) | 47 (19.7%) | 44 (18.4%) |
| *45-54* | 79 (16.5%) | 45 (18.8%) | 34 (14.2%) |
| *55-64* | 29 (6.1%) | 12 (5.0%) | 17 (7.1%) |
| *65+* | 22 (4.6%) | 11 (4.6%) | 11 (4.6%) |
| *Missing* | 6 (1.3%) | 5 (2.1%) | 1 (0.4%) |
| Nationality |  |  |  |
| *French* | 453 (94.8%) | 222 (92.9%) | 231 (96.7%) |
| *Other* | 25 (5.2%) | 17 (7.1%) | 8 (3.3%) |
| *Missing* | 0 (0%) | 0 (0%) | 0 (0%) |
| Mother tongue |  |  |  |
| *French* | 450 (94.1%) | 222 (92.5%) | 229 (95.8%) |
| *Other* | 28 (5.9%) | 18 (7.5%) | 10 (4.2%) |
| *Missing* | 0 (0%) | 0 (0%) | 0 (0%) |
| Education |  |  |  |
| *Primary school* | 1 (0.2%) | 0 (0%) | 1 (0.4%) |
| *Secondary school* | 4 (0.8%) | 1 (0.4%) | 3 (1,3%) |
| *Hight school* | 93 (19.5%) | 52 (21.8%) | 41 (17.2%) |
| *Currently university student* | 26 (5.4%) | 13 (5.4%) | 13 (5.4%) |
| *Bachelors* | 94 (19.7%) | 54 (22.6%) | 40 (16.7%) |
| *Masters* | 196 (41.0%) | 84 (35.1%) | 112 (46.9%) |
| *Doctorate* | 58 (12.1%) | 30 (12,6%) | 28 (11.7%) |
| *Missing* | 6 (1.3%) | 5 (2.1%) | 1 (0.4%) |
| Mental disorder |  |  |  |
| *No* | 420 (87.9%) | 209 (87.4%) | 211 (88.3%) |
| *Anxiety disorders* | 24 (5.0%) | 12 (5.0%) | 12 (5.0%) |
| *OCD or similar* | 6 (1.3%) | 4 (1.7%) | 2 (0.8%) |
| *PTSD* | 7 (1.5%) | 2 (0.8%) | 5 (2.1%) |
| *Psychotic disorder* | 0 (0%) | 0 (0%) | 0 (0%) |
| *Depressive disorder* | 31 (6.5%) | 13 (5.4%) | 18 (7.5%) |
| *Bipolar disorder* | 3 (0.6%) | 1 (0.4%) | 2 (0.8%) |
| *Dissociative disorder* | 2 (0.4%) | 1 (0.4%) | 1 (0.4%) |
| *Other* | 0 (0%) | 0 (0%) | 0 (0%) |
| *Prefer not to say* | 0 (0%) | 0 (0%) | 0 (0%) |
| *Missing* | 6 (1.3%) | 5 (2.1%) | 1 (0.4%) |
| Mental health treatment |  |  |  |
| *No* | 375 (78.5%) | 179 (74.9%) | 196 (82.0%) |
| *Psychotherapy* | 80 (16.7%) | 47 (19.7%) | 33 (13.8%) |
| *Psychiatric drug* | 30 (6.3%) | 14 (5.9%) | 16 (6.7%) |
| *Group therapy* | 1 (0.2%) | 1 (0.4%) | 0 (0%) |
| *Prefer not to say* | 0 (0%) | 0 (0%) | 0 (0%) |
| *Missing* | 6 (1.3%) | 5 (2.1%) | 1 (0.4%) |
| Clinical data |  |  |  |
| PERMA-Profiler |  |  |  |
| *Positive Emotion* | 6.48 ± 1.63 | 6.48 ± 1.55 | 6.48 ± 1.71 |
| *Engagement* | 6.95 ± 1.46 | 6.98 ± 1.48 | 6.92 ± 1.45 |
| *Relationships* | 7.08 ± 1.75 | 7.05 ± 1.63 | 7.11 ± 1.86 |
| *Meaning* | 6.72 ± 1.95 | 6.74 ± 1.85 | 6.70 ± 2.04 |
| *Accomplishment* | 7.05 ± 1.42 | 7.03 ± 1.40 | 7.08 ± 1.44 |
| *Overall well-being* | 6.86 ± 1.35 | 6.86 ± 1.28 | 6.87 ± 1.43 |
| *Negative Emotion* | 4.49 ± 1.83 | 4.68 ± 1.84 | 4.50 ± 1.83 |
| *Health* | 6.62 ± 1.91 | 6.54 ± 1.90 | 6.70 ± 1.92 |
| *Loneliness* | 3.51 ± 2.96 | 3.65 ± 2.93 | 3.36 ± 2.99 |
| *Happiness* | 6.95 ± 2.11 | 6.90 ± 1.98 | 6.99 ± 2.23 |
| *Missing* | 0 (0%) | 0 (0%) | 0 (0%) |
| Flourishing Scale | 43.0 ± 8.13 | 44.19 ± 8.27 | 43.75 ± 7.99 |
| *Missing* | 20 (4.2%) | 12 (5.0%) | 8 (3.3%) |
| *HADS* |  |  |  |
| *Anxiety* | 8.06 ± 3.88 | 8.23 ± 3.89 | 7.88 ± 3.87 |
| *Missing* | 13 (2.7%) | 8 (3.3%) | 5 (2.1%) |
| *Depression* | 4.49 ± 3.32 | 4.32 ± 3.43 | 4.67 ± 3.20 |
| *Missing* | 13 (2.7%) | 8 (3.3%) | 5 (2.1%) |

*Note. OCD: obsessive compulsive disorder or similar; PTSD: post-traumatic stress disorder; M: mean; SD: standard deviation; HADS: Hospital Anxiety and Depression Scale*

***Table B2.*** Univariate normality indices (skewness and kurtosis) for the 15 PERMA-Profiler core items in the EFA sample (G1, 5% students).

| **Item** | **Mean** | **SD** | **Min** | **Max** | **Skewness** | **Kurtosis** | **Shapiro-Wilk W** |
| --- | --- | --- | --- | --- | --- | --- | --- |
| **P1** | 6.36 | 1.96 | 1 | 10 | -.658 | .187 | .944 |
| **P2** | 6.59 | 1.99 | 1 | 10 | -.599 | -.141 | .942 |
| **P3** | 6.48 | 1.93 | 0 | 10 | -.925 | 1.03 | .922 |
| **E1** | 7.05 | 1.77 | 1 | 10 | -.739 | .612 | .931 |
| **E2** | 7.22 | 1.91 | 0 | 10 | -.844 | .868 | .929 |
| **E3** | 6.77 | 2.54 | 0 | 10 | -.743 | .00768 | .923 |
| **R1** | 6.77 | 2.38 | 0 | 10 | -.793 | .227 | .928 |
| **R2** | 7.38 | 2.03 | 0 | 10 | -.761 | .462 | .927 |
| **R3** | 6.95 | 2.21 | 0 | 10 | -.806 | .546 | .930 |
| **M1** | 6.50 | 2.22 | 0 | 10 | -.697 | .106 | .941 |
| **M2** | 6.77 | 2.25 | 0 | 10 | -.783 | .177 | .927 |
| **M3** | 6.71 | 2.25 | 0 | 10 | -.950 | .615 | .915 |
| **A1** | 6.34 | 1.89 | 0 | 10 | -.759 | .844 | .934 |
| **A2** | 6.73 | 1.90 | 0 | 10 | -.833 | .809 | .928 |
| **A3** | 8.07 | 1.84 | 0 | 10 | -1.32 | 2.54 | .865 |

*Note. Normality was assessed prior to conducting the EFA as the maximum likelihood extraction method assumes approximately normal distributions of observed variables. The analyses were performed on the EFA sample (G1, n = 239), after adjusting the student proportion to match the general population. All skewness and kurtosis values fell within acceptable ranges (|skew| < 2; |kurtosis| < 7; Kline, 2016), supporting the use of ML. Additionally, all Shapiro-Wilk tests were significant (p < .001). Normality analyses were not replicated on other subsamples (G2 or total) as they were not required for the CFA nor for general descriptive purposes.*
